# Supplementary material for: Beyond Healthcare Spending: Inequalities in the Use of Preventive Health Services among Europeans aged over 50
Source: Research Square preprint supplement (doi:10.21203/rs.3.rs-6628048/v1), 2025-09-04
Supplement: Supplementary file 1 [file cd98ab85b8198e2ef8fdbfd7.docx]

## Annex

Table A1 shows Andersen’s model and the different variables studied in the literature (Zhang et al., 2019). In our case, we sought to include as many of these variables as possible in the present analysis. In addition, under contextual characteristics, we considered country-specific factors, such as culture, popular beliefs, and traditions, while under need-based variables, we included global indicators of waiting lists.

| Table A1. Variables in the different levels of Andersen’s Model | | |
| --- | --- | --- |
| **Individual Characteristics** | | |
| Predisposing factors | Demographics | Sex |
| Age |
| Marital status |
| Household size |
| Genetics | Genetics† |
| Social | Education |
| Employment status |
| Occupation† |
| Employment sectors† |
| Ethnicity† |
| Technology (internet use*) |
| Beliefs | Trust * |
| Pray * |
| Personality traits * |
| Attitudes, values and knowledge about health and health services |
| Enabling factors | Financing | Income and wealth |
| Insurance coverage |
| Social support |
| Organisation | Regular source of care: private doctor, community clinic or emergency room |
| Transportation: travel time |
| Transportation: travel cost |
| Transportation: travel methods |
| Waiting time for care |
| Geographic location: rural-urban strata |
| Urbanisation |
| Industrialisation |
| Need factors | Perceived | Self-perceived health status |
| Evaluated | Professional judgment and objective measurements |
| Change and variety of social components |
| **Contextual Characteristics** | | |
| Predisposing factors | Country peculiarities | Country* |
| Enabling factors | Financing | Per capita community income and wealth |
| Per capita expenditure for health services |
| Health insurance coverage |
| Service charge/ healthcare price |
| Organisation | Amount and distribution of health services facilities and personnel |
| Structure and quality of services provided |
| Distance to closest health facility |
| Medicine availability |
| Infrastructure |
| Need factors |  | Waiting List (global indicators) * |

* Variables added by authors; † These variables were either not available or were not included in the analysis due to the type of sample.

## Detailed description of the personal trait variables

The response options for each question were as follows: 1. Disagree strongly 2. Disagree a little 3. Neither agree nor disagree 4. Agree a little 5. Agree strongly. The score for each trait variable was the average of its two items.

The questions for trait openness were:

- I see myself as someone who has few artistic interests

- I see myself as someone who has an active imagination

The questions for trait conscientiousness were:

- I see myself as someone who tends to be lazy
- I see myself as someone who does a thorough job

The questions for trait extraversion were:

- I see myself as someone who is reserved
- I see myself as someone who is outgoing sociable

The questions for trait agreeableness were:

- I see myself as someone who is generally trusting
- I see myself as someone who tends to find fault with others

The questions for trait neuroticism were:

- I see myself as someone who is relaxed, handles stress well
- I see myself as someone who gets nervous easily

## Detailed description of the dependent variables

For the GP contact variable the question was:

- How many of these contacts were with a general practitioner or with a doctor at your healthcare centre?

For specialist contact variable, the question was:

- How many of these contacts were with a specialist, excluding dentist and emergency visits?

For the flu vaccination variable, the question was:

- In the last year, did you have a flu vaccination?

For the eye exam variable, the question was:

- In the last two years, have you had an eye exam performed by an eye care professional such as an ophthalmologist or optometrist?

For the mammogram variable, the question was:

- In the last two years, have you had a mammogram (x-ray of the breast)?

For the cancer screening variable, the question was:

- Some health care providers do tests such as test for detecting hidden blood in your stool, sigmoidoscopy or colonoscopy to check for colon cancer. In the past two years have you had any of these tests?

And finally, for the dentist visit variable, the question was:

- During the last twelve months, have you seen a dentist or a dental hygienist?

| Table A2. Missing values on the selected sample | | |
| --- | --- | --- |
| **Variable** | **Number of missing values** | **%** |
| **Dependents** |  |  |
| doctor_contacs_bin | 458 | 1.57 |
| gp_contacts_bin | 3830 | 13.1 |
| esp_contacts_bin | 3837 | 13.1 |
| flu_vac | 123 | 0.42 |
| eye_exam | 111 | 0.38 |
| mammogram | 11223 | 38.4 |
| cancer_screening | 154 | 0.53 |
| dentist_visits | 104 | 0.36 |
| **Individual** |  |  |
| marstat | 2014 | 6.9 |
| bornincountry | 2137 | 7.32 |
| age_cat | 2 | 0.01 |
| edu | 150 | 0.51 |
| sphealth | 71 | 0.24 |
| longterm_illness | 68 | 0.23 |
| lim_act | 71 | 0.24 |
| employ | 945 | 3.24 |
| suphealthins | 148 | 0.51 |
| satis_bas_health_cov | 529 | 1.81 |
| income_tercile | 2580 | 8.84 |
| sn_prox_5km_bin | 1554 | 5.32 |
| social_support | 147 | 0.5 |
| thrust | 2558 | 8.76 |
| praying | 2558 | 8.76 |
| internet_use | 2672 | 9.15 |
| hh_location | 2952 | 10.1 |
| **Contextualsa** |  |  |
| aWe selected countries with all contextual vars | | |

Solamente se muestran variables con valores perdidos

Table A3. Correlation matrix of contextual variables.

|  | **GDP** | **hce_t** | **hce_gs_sc** | **hce_gs** | **hce_sc** | **hce_v** | **hce_oop** |
| --- | --- | --- | --- | --- | --- | --- | --- |
| GDP | 1.000 | 0.963 | 0.928 | 0.591 | 0.297 | 0.417 | 0.740 |
| hce_t | 0.963 | 1.000 | 0.980 | 0.638 | 0.299 | 0.494 | 0.665 |
| hce_gs_sc | 0.928 | 0.980 | 1.000 | 0.569 | 0.396 | 0.416 | 0.541 |
| hce_gs | 0.591 | 0.638 | 0.569 | 1.000 | -0.530 | 0.268 | 0.673 |
| hce_sc | 0.297 | 0.299 | 0.396 | -0.530 | 1.000 | 0.130 | -0.193 |
| hce_v | 0.417 | 0.494 | 0.416 | 0.268 | 0.130 | 1.000 | 0.119 |
| hce_oop | 0.740 | 0.665 | 0.541 | 0.673 | -0.193 | 0.119 | 1.000 |
| hic_ta | 0.006 | -0.019 | 0.136 | -0.531 | 0.732 | -0.114 | -0.548 |
| hic_ph | 0.216 | 0.410 | 0.470 | 0.537 | -0.114 | 0.231 | -0.008 |
| hic_dc | 0.098 | 0.146 | 0.256 | -0.432 | 0.746 | 0.312 | -0.490 |
| hic_opsc | -0.049 | 0.039 | 0.170 | -0.615 | 0.863 | -0.126 | -0.395 |
| hic_ic | -0.335 | -0.428 | -0.357 | -0.112 | -0.243 | -0.807 | -0.156 |
| am_pers_physicians | -0.274 | -0.341 | -0.310 | -0.176 | -0.122 | -0.709 | 0.015 |
| am_pers_midwives | -0.286 | -0.352 | -0.324 | -0.431 | 0.144 | -0.025 | -0.406 |
| am_pers_nurses | 0.037 | 0.038 | 0.028 | 0.069 | -0.048 | -0.099 | 0.131 |
| am_pers_dentist | -0.385 | -0.409 | -0.419 | -0.306 | -0.090 | -0.488 | -0.024 |
| am_pers_pharmacists | -0.196 | -0.185 | -0.234 | 0.370 | -0.653 | -0.105 | 0.090 |
| phy_gmp | 0.716 | 0.707 | 0.644 | 0.452 | 0.158 | 0.288 | 0.697 |
| phy_gp | 0.318 | 0.401 | 0.341 | 0.423 | -0.120 | -0.028 | 0.611 |
| phy_ogmp | 0.423 | 0.354 | 0.340 | 0.105 | 0.232 | 0.283 | 0.192 |
| phy_smp | 0.381 | 0.298 | 0.325 | 0.197 | 0.116 | -0.540 | 0.498 |
| phy_paedi | -0.066 | 0.009 | -0.065 | 0.349 | -0.456 | 0.597 | -0.075 |
| phy_gyn | 0.406 | 0.337 | 0.441 | -0.207 | 0.686 | -0.301 | 0.089 |
| phy_psy | 0.535 | 0.394 | 0.358 | 0.066 | 0.297 | -0.138 | 0.580 |
| phy_mgs | -0.105 | -0.228 | -0.159 | -0.156 | 0.012 | -0.899 | 0.090 |
| phy_sgs | 0.647 | 0.643 | 0.628 | 0.524 | 0.063 | -0.177 | 0.747 |
| st_beds | -0.001 | 0.065 | -0.027 | 0.674 | -0.779 | 0.272 | 0.248 |
| st_im1 | -0.360 | -0.222 | -0.122 | -0.539 | 0.475 | 0.081 | -0.634 |
| st_im2 | -0.543 | -0.564 | -0.500 | -0.869 | 0.454 | -0.216 | -0.621 |
| st_im3 | -0.528 | -0.647 | -0.695 | -0.487 | -0.172 | -0.523 | -0.070 |
| st_im4 | -0.558 | -0.664 | -0.686 | -0.773 | 0.155 | -0.443 | -0.233 |
| st_im5 | -0.192 | -0.186 | -0.154 | -0.203 | 0.067 | -0.018 | -0.279 |
| st_im6 | -0.330 | -0.352 | -0.316 | -0.503 | 0.235 | -0.213 | -0.322 |
| fin_res | -0.379 | -0.441 | -0.483 | -0.326 | -0.133 | 0.126 | -0.309 |
| dist_facility | -0.080 | -0.149 | -0.061 | 0.014 | -0.078 | -0.313 | -0.278 |
| wt_list | 0.155 | 0.071 | 0.048 | 0.040 | 0.003 | 0.311 | -0.041 |

Table A3. Correlation matrix of contextual variables. *(Continued)*

|  | **hic_ta** | **hic_ph** | **hic_dc** | **hic_opsc** | **hic_ic** | **am_pers_physicians** | **am_pers_midwives** | **am_pers_nurses** |
| --- | --- | --- | --- | --- | --- | --- | --- | --- |
| GDP | 0.006 | 0.216 | 0.098 | -0.049 | -0.335 | -0.274 | -0.286 | 0.037 |
| hce_t | -0.019 | 0.410 | 0.146 | 0.039 | -0.428 | -0.341 | -0.352 | 0.038 |
| hce_gs_sc | 0.136 | 0.470 | 0.256 | 0.170 | -0.357 | -0.310 | -0.324 | 0.028 |
| hce_gs | -0.531 | 0.537 | -0.432 | -0.615 | -0.112 | -0.176 | -0.431 | 0.069 |
| hce_sc | 0.732 | -0.114 | 0.746 | 0.863 | -0.243 | -0.122 | 0.144 | -0.048 |
| hce_v | -0.114 | 0.231 | 0.312 | -0.126 | -0.807 | -0.709 | -0.025 | -0.099 |
| hce_oop | -0.548 | -0.008 | -0.490 | -0.395 | -0.156 | 0.015 | -0.406 | 0.131 |
| hic_ta | 1.000 | -0.037 | 0.747 | 0.624 | 0.168 | 0.026 | 0.363 | 0.026 |
| hic_ph | -0.037 | 1.000 | 0.223 | 0.040 | -0.326 | -0.154 | -0.447 | 0.208 |
| hic_dc | 0.747 | 0.223 | 1.000 | 0.615 | -0.464 | -0.472 | 0.393 | 0.268 |
| hic_opsc | 0.624 | 0.040 | 0.615 | 1.000 | -0.092 | 0.088 | 0.017 | -0.070 |
| hic_ic | 0.168 | -0.326 | -0.464 | -0.092 | 1.000 | 0.687 | 0.017 | -0.301 |
| am_pers_physicians | 0.026 | -0.154 | -0.472 | 0.088 | 0.687 | 1.000 | -0.522 | -0.302 |
| am_pers_midwives | 0.363 | -0.447 | 0.393 | 0.017 | 0.017 | -0.522 | 1.000 | 0.411 |
| am_pers_nurses | 0.026 | 0.208 | 0.268 | -0.070 | -0.301 | -0.302 | 0.411 | 1.000 |
| am_pers_dentist | -0.059 | -0.347 | -0.523 | 0.141 | 0.530 | 0.831 | -0.351 | -0.297 |
| am_pers_pharmacists | -0.445 | 0.141 | -0.711 | -0.499 | 0.402 | 0.576 | -0.655 | -0.560 |
| phy_gmp | -0.053 | 0.212 | 0.032 | -0.063 | -0.399 | -0.161 | -0.155 | 0.527 |
| phy_gp | -0.622 | 0.338 | -0.409 | 0.052 | -0.222 | 0.239 | -0.770 | -0.084 |
| phy_ogmp | 0.404 | -0.052 | 0.327 | -0.096 | -0.202 | -0.321 | 0.419 | 0.542 |
| phy_smp | -0.087 | 0.047 | -0.133 | 0.116 | 0.238 | 0.323 | -0.296 | 0.137 |
| phy_paedi | -0.471 | 0.393 | -0.030 | -0.476 | -0.491 | -0.386 | -0.235 | -0.205 |
| phy_gyn | 0.498 | -0.048 | 0.470 | 0.569 | 0.080 | 0.022 | 0.067 | 0.056 |
| phy_psy | 0.013 | -0.061 | 0.065 | 0.082 | -0.157 | 0.276 | -0.352 | 0.220 |
| phy_mgs | 0.146 | -0.160 | -0.201 | 0.129 | 0.664 | 0.699 | -0.151 | 0.074 |
| phy_sgs | -0.311 | 0.222 | -0.194 | 0.032 | -0.059 | -0.015 | -0.330 | 0.203 |
| st_beds | -0.781 | 0.370 | -0.482 | -0.708 | -0.165 | -0.248 | -0.292 | -0.139 |
| st_im1 | 0.354 | -0.090 | 0.356 | 0.680 | 0.004 | -0.172 | 0.227 | -0.418 |
| st_im2 | 0.432 | -0.646 | 0.253 | 0.549 | 0.246 | 0.034 | 0.539 | -0.265 |
| st_im3 | -0.070 | -0.643 | -0.450 | -0.055 | 0.473 | 0.671 | 0.040 | -0.023 |
| st_im4 | 0.104 | -0.721 | -0.129 | 0.259 | 0.272 | 0.487 | 0.215 | 0.016 |
| st_im5 | 0.405 | -0.065 | -0.039 | 0.090 | 0.297 | 0.426 | -0.086 | -0.163 |
| st_im6 | 0.284 | -0.634 | -0.152 | 0.309 | 0.493 | 0.216 | 0.311 | -0.450 |
| fin_res | 0.010 | 0.002 | 0.252 | -0.183 | -0.324 | 0.035 | 0.054 | 0.251 |
| dist_facility | 0.325 | 0.261 | 0.353 | -0.134 | 0.187 | -0.032 | 0.225 | 0.287 |
| wt_list | 0.118 | 0.067 | 0.502 | -0.289 | -0.453 | -0.613 | 0.498 | 0.520 |

Table A3. Correlation matrix of contextual variables. *(Continued)*

|  | **am_pers_dentist** | **am_pers_pharmacists** | **phy_gmp** | **phy_gp** | **phy_ogmp** | **phy_smp** | **phy_paedi** | **phy_gyn** |
| --- | --- | --- | --- | --- | --- | --- | --- | --- |
| GDP | -0.385 | -0.196 | 0.716 | 0.318 | 0.423 | 0.381 | -0.066 | 0.406 |
| hce_t | -0.409 | -0.185 | 0.707 | 0.401 | 0.354 | 0.298 | 0.009 | 0.337 |
| hce_gs_sc | -0.419 | -0.234 | 0.644 | 0.341 | 0.340 | 0.325 | -0.065 | 0.441 |
| hce_gs | -0.306 | 0.370 | 0.452 | 0.423 | 0.105 | 0.197 | 0.349 | -0.207 |
| hce_sc | -0.090 | -0.653 | 0.158 | -0.120 | 0.232 | 0.116 | -0.456 | 0.686 |
| hce_v | -0.488 | -0.105 | 0.288 | -0.028 | 0.283 | -0.540 | 0.597 | -0.301 |
| hce_oop | -0.024 | 0.090 | 0.697 | 0.611 | 0.192 | 0.498 | -0.075 | 0.089 |
| hic_ta | -0.059 | -0.445 | -0.053 | -0.622 | 0.404 | -0.087 | -0.471 | 0.498 |
| hic_ph | -0.347 | 0.141 | 0.212 | 0.338 | -0.052 | 0.047 | 0.393 | -0.048 |
| hic_dc | -0.523 | -0.711 | 0.032 | -0.409 | 0.327 | -0.133 | -0.030 | 0.470 |
| hic_opsc | 0.141 | -0.499 | -0.063 | 0.052 | -0.096 | 0.116 | -0.476 | 0.569 |
| hic_ic | 0.530 | 0.402 | -0.399 | -0.222 | -0.202 | 0.238 | -0.491 | 0.080 |
| am_pers_physicians | 0.831 | 0.576 | -0.161 | 0.239 | -0.321 | 0.323 | -0.386 | 0.022 |
| am_pers_midwives | -0.351 | -0.655 | -0.155 | -0.770 | 0.419 | -0.296 | -0.235 | 0.067 |
| am_pers_nurses | -0.297 | -0.560 | 0.527 | -0.084 | 0.542 | 0.137 | -0.205 | 0.056 |
| am_pers_dentist | 1.000 | 0.492 | -0.064 | 0.167 | -0.179 | -0.074 | -0.453 | -0.290 |
| am_pers_pharmacists | 0.492 | 1.000 | -0.265 | 0.248 | -0.423 | -0.141 | 0.377 | -0.569 |
| phy_gmp | -0.064 | -0.265 | 1.000 | 0.275 | 0.714 | 0.156 | -0.278 | 0.056 |
| phy_gp | 0.167 | 0.248 | 0.275 | 1.000 | -0.477 | 0.527 | 0.115 | 0.093 |
| phy_ogmp | -0.179 | -0.423 | 0.714 | -0.477 | 1.000 | -0.241 | -0.337 | -0.016 |
| phy_smp | -0.074 | -0.141 | 0.156 | 0.527 | -0.241 | 1.000 | -0.338 | 0.740 |
| phy_paedi | -0.453 | 0.377 | -0.278 | 0.115 | -0.337 | -0.338 | 1.000 | -0.464 |
| phy_gyn | -0.290 | -0.569 | 0.056 | 0.093 | -0.016 | 0.740 | -0.464 | 1.000 |
| phy_psy | -0.014 | -0.174 | 0.482 | 0.412 | 0.140 | 0.713 | -0.214 | 0.563 |
| phy_mgs | 0.312 | 0.061 | -0.151 | 0.166 | -0.259 | 0.792 | -0.516 | 0.556 |
| phy_sgs | -0.225 | -0.203 | 0.456 | 0.697 | -0.090 | 0.839 | -0.233 | 0.557 |
| st_beds | -0.344 | 0.509 | -0.200 | 0.345 | -0.435 | -0.038 | 0.800 | -0.464 |
| st_im1 | 0.074 | -0.236 | -0.505 | -0.173 | -0.336 | -0.360 | -0.116 | 0.098 |
| st_im2 | 0.292 | -0.338 | -0.526 | -0.457 | -0.148 | -0.297 | -0.404 | 0.131 |
| st_im3 | 0.842 | 0.269 | -0.106 | -0.108 | -0.018 | -0.102 | -0.428 | -0.304 |
| st_im4 | 0.696 | -0.068 | -0.183 | -0.155 | -0.054 | -0.093 | -0.473 | -0.078 |
| st_im5 | 0.630 | 0.348 | 0.133 | -0.387 | 0.404 | -0.558 | -0.292 | -0.426 |
| st_im6 | 0.554 | 0.011 | -0.302 | -0.365 | -0.010 | -0.359 | -0.528 | -0.098 |
| fin_res | -0.070 | 0.058 | -0.156 | -0.222 | 0.019 | -0.233 | 0.456 | -0.251 |
| dist_facility | -0.512 | -0.138 | -0.278 | -0.332 | -0.012 | 0.365 | 0.152 | 0.403 |
| wt_list | -0.801 | -0.480 | 0.086 | -0.390 | 0.363 | 0.024 | 0.371 | 0.176 |

Table A3. Correlation matrix of contextual variables. *(Continued)*

|  | **phy_psy** | **phy_mgs** | **phy_sgs** | **st_beds** | **st_im1** | **st_im2** | **st_im3** | **st_im4** |
| --- | --- | --- | --- | --- | --- | --- | --- | --- |
| GDP | 0.535 | -0.105 | 0.647 | -0.001 | -0.360 | -0.543 | -0.528 | -0.558 |
| hce_t | 0.394 | -0.228 | 0.643 | 0.065 | -0.222 | -0.564 | -0.647 | -0.664 |
| hce_gs_sc | 0.358 | -0.159 | 0.628 | -0.027 | -0.122 | -0.500 | -0.695 | -0.686 |
| hce_gs | 0.066 | -0.156 | 0.524 | 0.674 | -0.539 | -0.869 | -0.487 | -0.773 |
| hce_sc | 0.297 | 0.012 | 0.063 | -0.779 | 0.475 | 0.454 | -0.172 | 0.155 |
| hce_v | -0.138 | -0.899 | -0.177 | 0.272 | 0.081 | -0.216 | -0.523 | -0.443 |
| hce_oop | 0.580 | 0.090 | 0.747 | 0.248 | -0.634 | -0.621 | -0.070 | -0.233 |
| hic_ta | 0.013 | 0.146 | -0.311 | -0.781 | 0.354 | 0.432 | -0.070 | 0.104 |
| hic_ph | -0.061 | -0.160 | 0.222 | 0.370 | -0.090 | -0.646 | -0.643 | -0.721 |
| hic_dc | 0.065 | -0.201 | -0.194 | -0.482 | 0.356 | 0.253 | -0.450 | -0.129 |
| hic_opsc | 0.082 | 0.129 | 0.032 | -0.708 | 0.680 | 0.549 | -0.055 | 0.259 |
| hic_ic | -0.157 | 0.664 | -0.059 | -0.165 | 0.004 | 0.246 | 0.473 | 0.272 |
| am_pers_physicians | 0.276 | 0.699 | -0.015 | -0.248 | -0.172 | 0.034 | 0.671 | 0.487 |
| am_pers_midwives | -0.352 | -0.151 | -0.330 | -0.292 | 0.227 | 0.539 | 0.040 | 0.215 |
| am_pers_nurses | 0.220 | 0.074 | 0.203 | -0.139 | -0.418 | -0.265 | -0.023 | 0.016 |
| am_pers_dentist | -0.014 | 0.312 | -0.225 | -0.344 | 0.074 | 0.292 | 0.842 | 0.696 |
| am_pers_pharmacists | -0.174 | 0.061 | -0.203 | 0.509 | -0.236 | -0.338 | 0.269 | -0.068 |
| phy_gmp | 0.482 | -0.151 | 0.456 | -0.200 | -0.505 | -0.526 | -0.106 | -0.183 |
| phy_gp | 0.412 | 0.166 | 0.697 | 0.345 | -0.173 | -0.457 | -0.108 | -0.155 |
| phy_ogmp | 0.140 | -0.259 | -0.090 | -0.435 | -0.336 | -0.148 | -0.018 | -0.054 |
| phy_smp | 0.713 | 0.792 | 0.839 | -0.038 | -0.360 | -0.297 | -0.102 | -0.093 |
| phy_paedi | -0.214 | -0.516 | -0.233 | 0.800 | -0.116 | -0.404 | -0.428 | -0.473 |
| phy_gyn | 0.563 | 0.556 | 0.557 | -0.464 | 0.098 | 0.131 | -0.304 | -0.078 |
| phy_psy | 1.000 | 0.508 | 0.549 | -0.249 | -0.596 | -0.379 | 0.072 | 0.108 |
| phy_mgs | 0.508 | 1.000 | 0.387 | -0.263 | -0.288 | -0.002 | 0.350 | 0.294 |
| phy_sgs | 0.549 | 0.387 | 1.000 | 0.149 | -0.309 | -0.466 | -0.359 | -0.371 |
| st_beds | -0.249 | -0.263 | 0.149 | 1.000 | -0.275 | -0.561 | -0.372 | -0.560 |
| st_im1 | -0.596 | -0.288 | -0.309 | -0.275 | 1.000 | 0.761 | -0.121 | 0.135 |
| st_im2 | -0.379 | -0.002 | -0.466 | -0.561 | 0.761 | 1.000 | 0.392 | 0.647 |
| st_im3 | 0.072 | 0.350 | -0.359 | -0.372 | -0.121 | 0.392 | 1.000 | 0.906 |
| st_im4 | 0.108 | 0.294 | -0.371 | -0.560 | 0.135 | 0.647 | 0.906 | 1.000 |
| st_im5 | -0.248 | -0.146 | -0.609 | -0.455 | 0.076 | 0.171 | 0.484 | 0.324 |
| st_im6 | -0.483 | -0.059 | -0.378 | -0.473 | 0.627 | 0.804 | 0.478 | 0.521 |
| fin_res | 0.232 | -0.034 | -0.509 | 0.052 | -0.339 | -0.090 | 0.246 | 0.295 |
| dist_facility | 0.201 | 0.470 | 0.035 | 0.100 | -0.316 | -0.233 | -0.305 | -0.298 |
| wt_list | 0.232 | -0.128 | -0.040 | 0.152 | -0.386 | -0.238 | -0.394 | -0.275 |

Table A3. Correlation matrix of contextual variables. *(Continued)*

|  | **st_im5** | **st_im6** | **fin_res** | **dist_facility** | **wt_list** |
| --- | --- | --- | --- | --- | --- |
| GDP | -0.192 | -0.330 | -0.379 | -0.080 | 0.155 |
| hce_t | -0.186 | -0.352 | -0.441 | -0.149 | 0.071 |
| hce_gs_sc | -0.154 | -0.316 | -0.483 | -0.061 | 0.048 |
| hce_gs | -0.203 | -0.503 | -0.326 | 0.014 | 0.040 |
| hce_sc | 0.067 | 0.235 | -0.133 | -0.078 | 0.003 |
| hce_v | -0.018 | -0.213 | 0.126 | -0.313 | 0.311 |
| hce_oop | -0.279 | -0.322 | -0.309 | -0.278 | -0.041 |
| hic_ta | 0.405 | 0.284 | 0.010 | 0.325 | 0.118 |
| hic_ph | -0.065 | -0.634 | 0.002 | 0.261 | 0.067 |
| hic_dc | -0.039 | -0.152 | 0.252 | 0.353 | 0.502 |
| hic_opsc | 0.090 | 0.309 | -0.183 | -0.134 | -0.289 |
| hic_ic | 0.297 | 0.493 | -0.324 | 0.187 | -0.453 |
| am_pers_physicians | 0.426 | 0.216 | 0.035 | -0.032 | -0.613 |
| am_pers_midwives | -0.086 | 0.311 | 0.054 | 0.225 | 0.498 |
| am_pers_nurses | -0.163 | -0.450 | 0.251 | 0.287 | 0.520 |
| am_pers_dentist | 0.630 | 0.554 | -0.070 | -0.512 | -0.801 |
| am_pers_pharmacists | 0.348 | 0.011 | 0.058 | -0.138 | -0.480 |
| phy_gmp | 0.133 | -0.302 | -0.156 | -0.278 | 0.086 |
| phy_gp | -0.387 | -0.365 | -0.222 | -0.332 | -0.390 |
| phy_ogmp | 0.404 | -0.010 | 0.019 | -0.012 | 0.363 |
| phy_smp | -0.558 | -0.359 | -0.233 | 0.365 | 0.024 |
| phy_paedi | -0.292 | -0.528 | 0.456 | 0.152 | 0.371 |
| phy_gyn | -0.426 | -0.098 | -0.251 | 0.403 | 0.176 |
| phy_psy | -0.248 | -0.483 | 0.232 | 0.201 | 0.232 |
| phy_mgs | -0.146 | -0.059 | -0.034 | 0.470 | -0.128 |
| phy_sgs | -0.609 | -0.378 | -0.509 | 0.035 | -0.040 |
| st_beds | -0.455 | -0.473 | 0.052 | 0.100 | 0.152 |
| st_im1 | 0.076 | 0.627 | -0.339 | -0.316 | -0.386 |
| st_im2 | 0.171 | 0.804 | -0.090 | -0.233 | -0.238 |
| st_im3 | 0.484 | 0.478 | 0.246 | -0.305 | -0.394 |
| st_im4 | 0.324 | 0.521 | 0.295 | -0.298 | -0.275 |
| st_im5 | 1.000 | 0.472 | 0.059 | -0.322 | -0.441 |
| st_im6 | 0.472 | 1.000 | -0.455 | -0.527 | -0.600 |
| fin_res | 0.059 | -0.455 | 1.000 | 0.372 | 0.541 |
| dist_facility | -0.322 | -0.527 | 0.372 | 1.000 | 0.652 |
| wt_list | -0.441 | -0.600 | 0.541 | 0.652 | 1.000 |
